# Supplementary material
Source: PubMed Central journal article supplement (PMC4505820)
Supplement: NIHMS706544-supplement-supplemental.pdf [file NIHMS706544-supplement-supplemental.pdf]

## Supplementary Materials for

### MAPK feedback encodes a switch and timer for tunable stress adaptation in yeast

Justin G. English, James P. Shellhammer, Michael Malahe, Patrick C. McCarter, Timothy C. Elston, Henrik G. Dohlman\*

\*Corresponding author. E-mail: [hdohlman@med.unc.edu](mailto:hdohlman@med.unc.edu)

Published 13 January 2015, *Sci. Signal.* **8**, ra5 (2015)

DOI: [10.1126/scisignal.2005774](https://doi.org/10.1126/scisignal.2005774)

#### This PDF file includes:

Fig. S1. The antibodies generated against phosphorylated p38 recognize monophosphorylated and dually phosphorylated Hog1.  
Fig. S2. Negative feedback only model fails to capture the Hog1 signaling profile.  
Fig. S3. Hog1 signaling profile in the *Ste50<sup>5A</sup>* strain.  
Fig. S4. Hog1 signaling profile in *skl1Δ* and *rga1Δ* yeast.  
Fig. S5. Gating parameters for flow cytometry data.  
Table S1. Transcription factor binding and interaction analysis.  
Table S2. List of yeast strains used in this study.  
Table S3. List of parameter values used in modeling.  
Legends for database S1 and S2

#### Other Supplementary Material for this manuscript includes the following:

(available at [www.sciencesignaling.org/cgi/content/full/8/359/ra5/DC1](http://www.sciencesignaling.org/cgi/content/full/8/359/ra5/DC1))

Database S1 (Microsoft Excel format). Annotated microarray data with GO analysis and organization.

Database S2 (Microsoft Excel format). Induction of 95 proteins from clusters 1 to 4 in response to 0, 350, or 650 mM KCl.

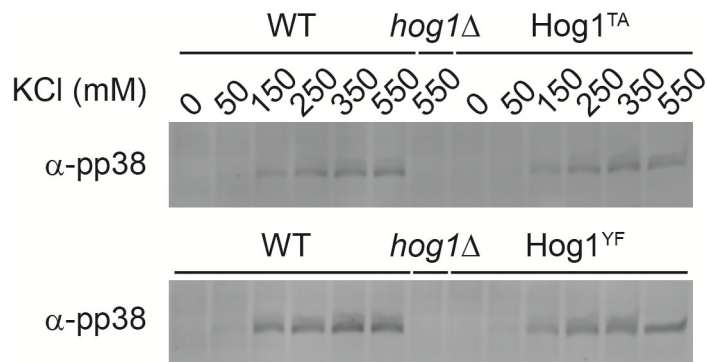

**Fig. S1. The antibodies generated against phosphorylated p38 recognize monophosphorylated and dually phosphorylated Hog1.** The indicated strains were treated with KCl for five minutes, collected, lysed, and analyzed by Western blotting using the phospho-p38 antibodies.

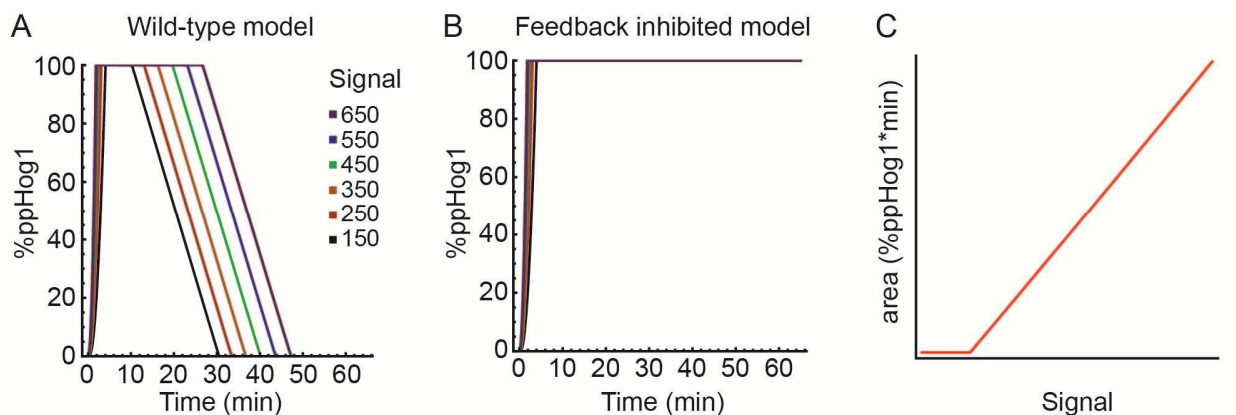

**Fig. S2. Negative feedback only model fails to capture the Hog1 signaling profile.** The model of Behar *et al.* (23) fails to explain catalytically-inactive Hog1 mutant experimental time-courses. (A) The model of the wild-type behavior. (B) The model when Hog1 feedback is inhibited model. (C) The total amount of ppHog1 from the model of wild-type cells.

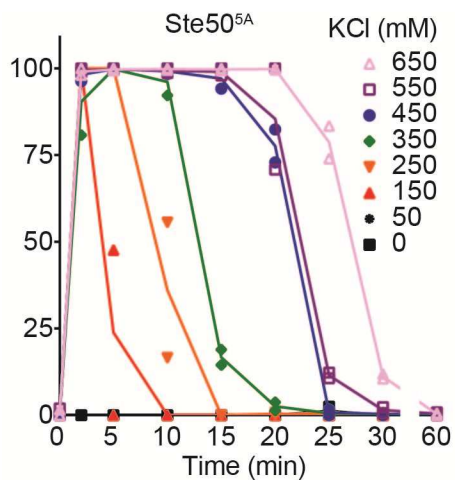

**Fig. S3. Hog1 signaling profile in the *Ste50*<sup>5A</sup> strain.** Hog1 signaling profile in the *Ste50*<sup>5A</sup> strain. Data represent two experiments.

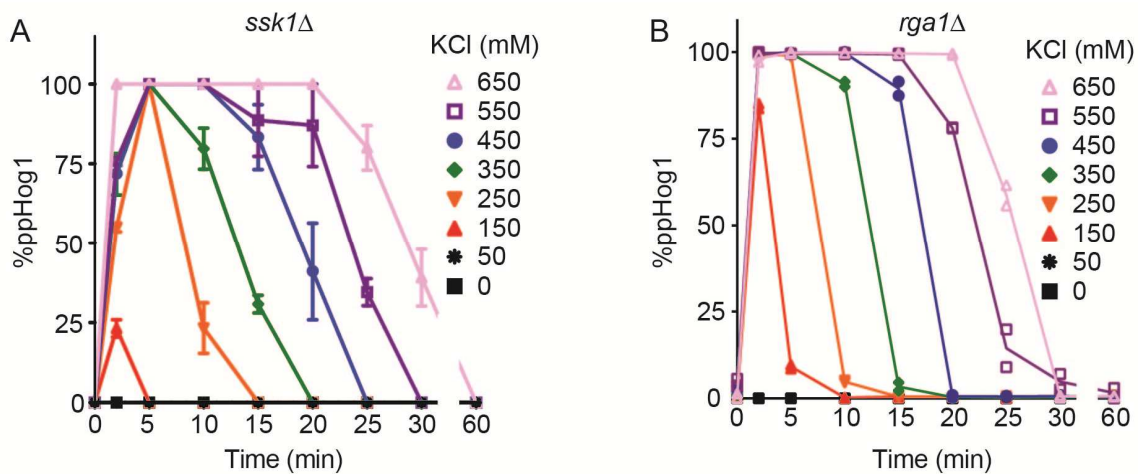

**Fig. S4. Hog1 signaling profile in *ssk1Δ* and *rga1Δ* yeast.** (A) Hog1 signaling profile in an *ssk1Δ* strain determined as described in Fig. 1. Data are means  $\pm$  SEM (n = 3). (B) Hog1 signaling profile in an *rga1Δ* strain, determined as described in Fig. 1. Data represent two experiments.

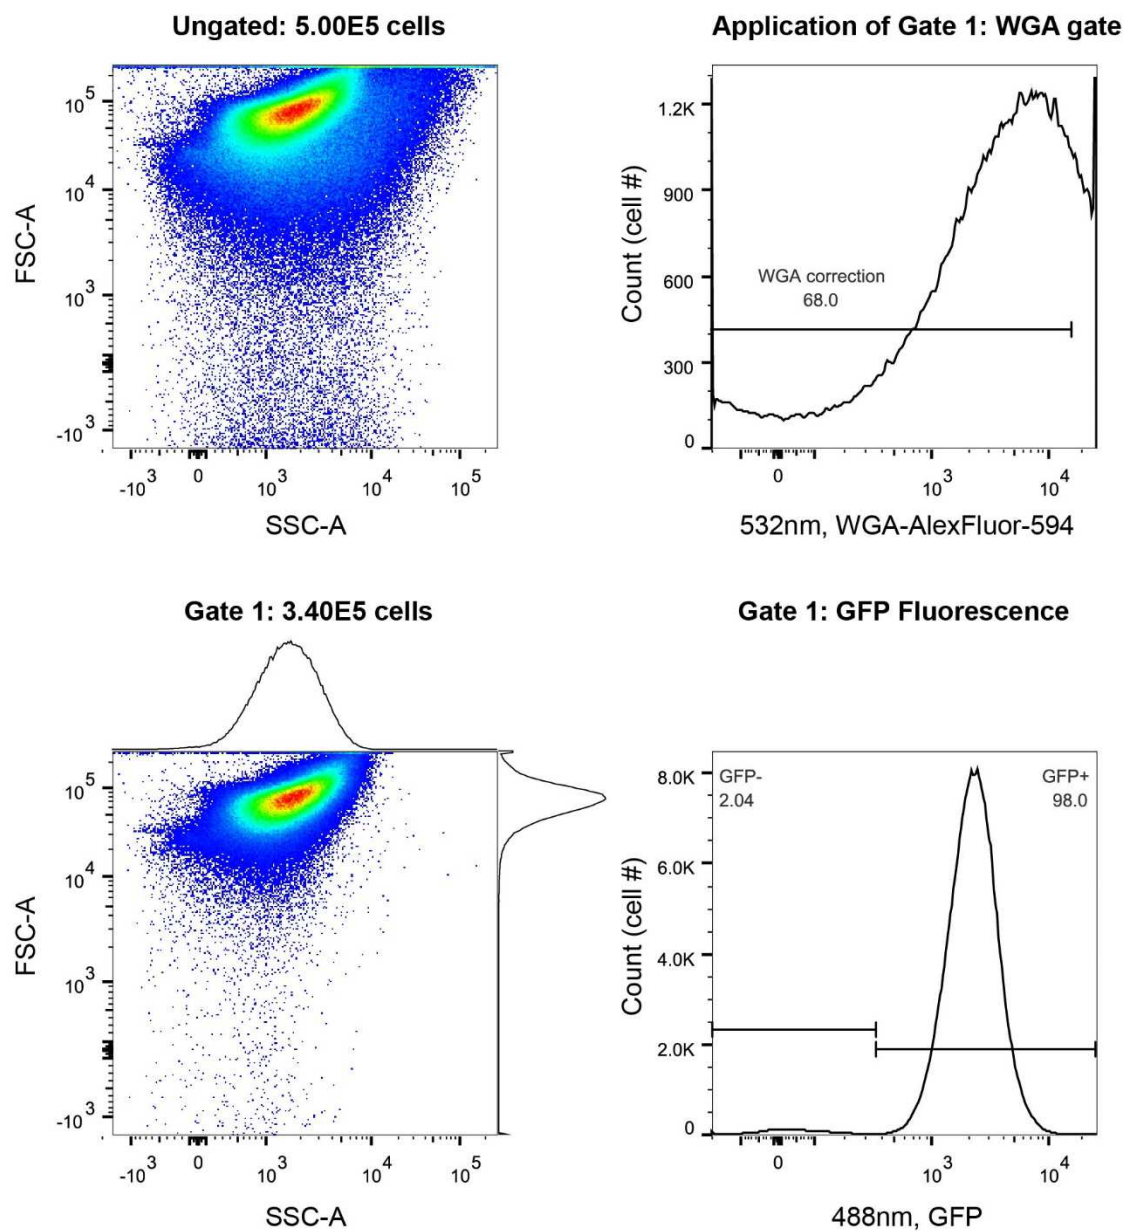

**Fig. S5. Gating parameters for flow cytometry data.** Gate 1 establishes a cut-off for auto-fluorescent debris and dead cells determined by staining with wheat germ-agglutinin (WGA) conjugated to AlexFluor-594. Fluorescence minus one (FMO) experiments were performed to compensate for bleed-through on line. Data are compensated fluorescence values. FSC-A, forward scatter area; SSC-A, side scatter area.

**Table S1. Transcription factor binding and interaction analysis.** Percent value represents number of query set gene promoters associated with the transcription factor (TF). p-value calculations and cut-offs were determined as outlined on YEASTRACT. Significance of gene set (left) to TF (top) association indicated as highly significant (\*\*,  $p < 1E^{-5}$ ), significant (\*,  $p < 1E^{-5}$ ), or nonsignificant ( $p > 0.01$ ). 67 random genes were selected from the yeast genome as a negative control.

|                             | <b>Msn2</b>         | <b>Msn4</b>         | <b>Sko1</b>           | <b>Hot1</b>            | <b>Hog1</b>           |
|-----------------------------|---------------------|---------------------|-----------------------|------------------------|-----------------------|
| <b>random (67)</b>          | 51.56%<br>(0.245)   | 37.50%<br>(0.346)   | 21.88%<br>(0.016)     | 1.56%<br>(0.152)       | 9.38%<br>(0.003)      |
| <b>All microarray (252)</b> | 95.63%<br>(0**)     | 87.30%<br>(0**)     | 46.83%<br>(0**)       | 17.86%<br>(0**)        | 10.71%<br>(1.2E-09**) |
| <b>C1 (107)</b>             | 98.10%<br>(0**)     | 94.39%<br>(0**)     | 57.94%<br>(0**)       | 28.97%<br>(0**)        | 13.08%<br>(5.4E-07**) |
| <b>C2 (111)</b>             | 96.40%<br>(0**)     | 87.39%<br>(0**)     | 37.84%<br>(6.3E-12**) | 11.71%<br>(8.3E-12)**  | 10.81%<br>(2.4E-05**) |
| <b>C3&amp;4 (34)</b>        | 85.29%<br>(1E-06**) | 64.71%<br>(1.8E-4*) | 41.18%<br>(8.0E-08**) | 2.94%<br>(0.052)       | 2.94%<br>(0.27)       |
| <b>flow cytometry (67)</b>  | 94.03<br>(0**)      | 82.09%<br>(1E-15**) | 49.25%<br>(9.3E-14**) | 14.93%<br>(9.24E-11**) | 13.43<br>(2.55E-05**) |

**Table S2. List of yeast strains used in this study.**

| Strain | Genotype                                                         | Background | Reference  |
|--------|------------------------------------------------------------------|------------|------------|
| BY4741 | <i>MATa, his3Δ1, leu2Δ, met15Δ, ura3Δ</i>                        | BY4743     | (73)       |
| JGE001 | <i>hog1<sup>T100A</sup></i>                                      | BY4741     | This study |
| JGE002 | <i>ssk1Δ::KanMX4</i>                                             | BY4741     | This study |
| JGE003 | <i>ssk2Δ::KanMX4</i>                                             | BY4741     | This study |
| JGE004 | <i>ssk22Δ::KanMX4</i>                                            | BY4741     | This study |
| JGE005 | <i>pbs2Δ::KanMX4</i>                                             | BY4741     | This study |
| JGE006 | <i>msb2Δ::KanMX4</i>                                             | BY4741     | This study |
| JGE007 | <i>hkr1Δ::KanMX4</i>                                             | BY4741     | This study |
| JGE008 | <i>rga1Δ::KanMX4</i>                                             | BY4741     | This study |
| JGE009 | <i>rga2Δ::KanMX4</i>                                             | BY4741     | This study |
| JGE010 | <i>bem3Δ::KanMX4</i>                                             | BY4741     | This study |
| JGE011 | <i>ste20Δ::KanMX4</i>                                            | BY4741     | This study |
| JGE012 | <i>ste11Δ::KanMX4</i>                                            | BY4741     | This study |
| JGE013 | <i>opy2Δ::KanMX4</i>                                             | BY4741     | This study |
| JGE014 | <i>ste50Δ::KanMX4</i>                                            | BY4741     | This study |
| JGE015 | <i>hog1Δ::KanMX4</i>                                             | BY4741     | This study |
| JGE016 | <i>ptc1Δ::KanMX4</i>                                             | BY4741     | This study |
| JGE017 | <i>ptc2Δ::KanMX4</i>                                             | BY4741     | This study |
| JGE018 | <i>ptp2Δ::KanMX4 ptp3Δ::LEU2</i>                                 | BY4741     | This study |
| JGE019 | <i>ptp2Δ::KanMX4</i>                                             | BY4741     | This study |
| JGE020 | <i>ptp3Δ::LEU2</i>                                               | BY4741     | This study |
| JGE021 | <i>hog1<sup>T174A</sup></i>                                      | BY4741     | This study |
| JGE022 | <i>hog1<sup>Y176F</sup></i>                                      | BY4741     | This study |
| JGE023 | <i>ste50<sup>S5A</sup> (S155A, S196A, S202A, S248A, Thr341A)</i> | BY4741     | (18)       |

**Table S3. List of parameter values used in modeling.**

| Parameter | Value       |
|-----------|-------------|
| k1        | 0.303763    |
| k1m       | 0.675469    |
| k2        | 7.73342     |
| k2m       | 2.14647     |
| a         | 3.77649     |
| k3        | 0.000935217 |
| k3m       | 0.550563    |
| k4        | 0.0039341   |
| k4m       | 0.987791    |
| k5        | 71.749      |
| k5m       | 122.966     |
| k6        | 0.675903    |
| k6m       | 8.02219     |
| kn        | 0.000118967 |
| kc        | 0.000102928 |
| k8        | 0.0168266   |
| k8m       | 0.678538    |
| k9        | 0.000133456 |
| k9m       | 0.585395    |
| k10       | 0.000116113 |
| k12       | 0.000173807 |

**Database S1. Annotated microarray data with GO analysis and organization.** C1, cluster 1; C2, cluster 2; C3 & 4; clusters 3 and 4. Data were classified by “biological process.”

**Database S2. Induction of 95 proteins from clusters 1 to 4 in response to 0, 350, or 650 mM KCl.**
